# Supplementary material for: Modulation of miR-146a/complement factor H-mediated inflammatory responses in a rat model of temporal lobe epilepsy
Source: Oxford University Press journal article supplement (doi:10.1042/bsr20160290), 2016-11-17

## Supplementary figure legends

**Supplementary Figure S1. Downregulating miR-146a enhanced CFH expression in human neuronal and glial cell lines.** Quantitative RT-PCR (A) and immunoblot analysis (B & C) of the effect of transient transfection of miR-146a inhibitor on CFH mRNA and protein levels in SH-SY5Y cells, \*,  $P < 0.05$ . (D-F) Quantitative RT-PCR and immunoblot analysis of the effect of transient transfection of miR-146a inhibitor on CFH mRNA and protein levels in THP-1 cells, \*,  $P < 0.05$ . (G-I) Quantitative RT-PCR and immunoblot analysis of the effect of transient transfection of miR-146a inhibitor on CFH mRNA and protein levels in U373 cells, \*,  $P < 0.05$ .

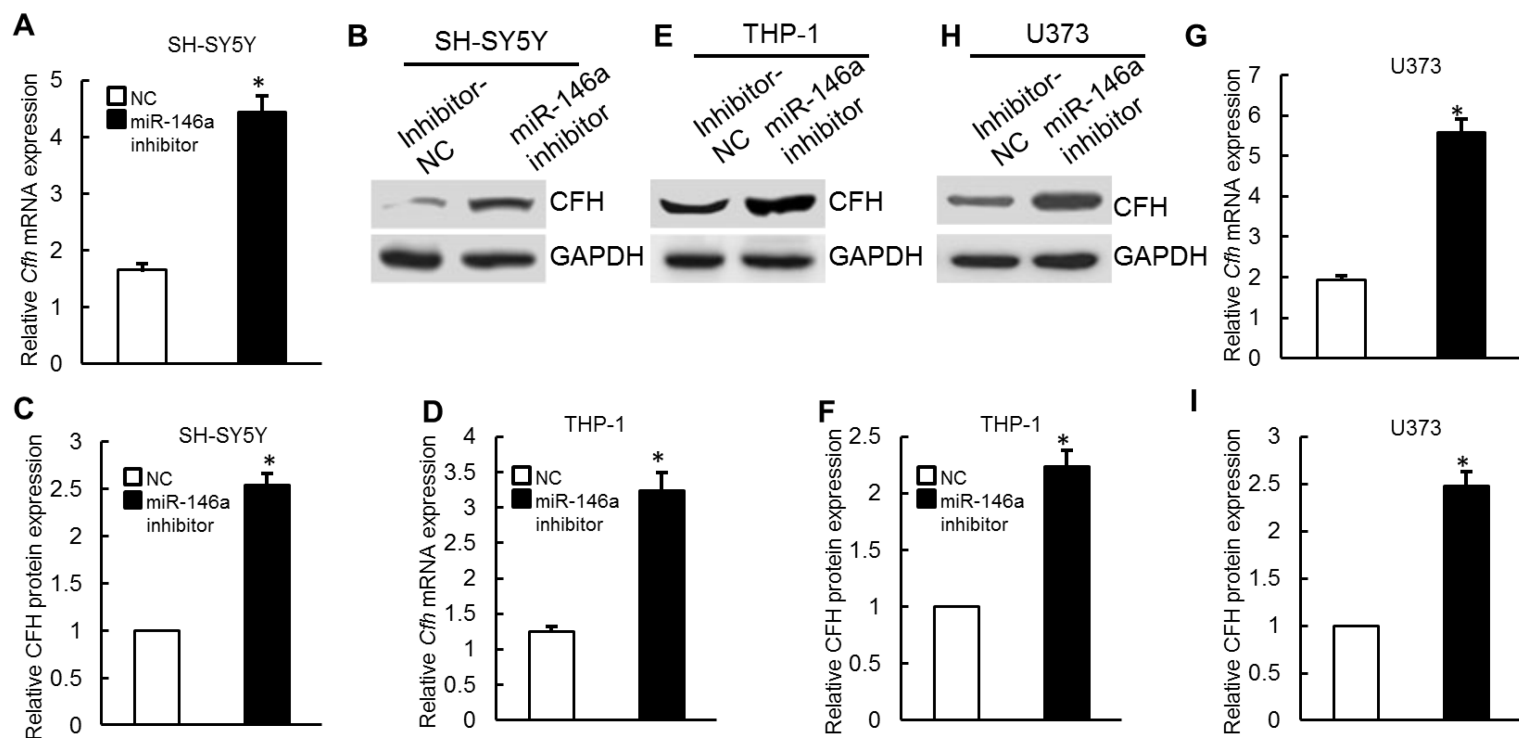

Supplement: bsr036e433add.pdf [file bsr036e433add.pdf]
